# Supplementary material for: AnB8−: borozene complexes with monovalent actinide
Source: Royal Society of Chemistry journal article supplement (doi:10.1039/d4cp01646g), 2024-01-01
Supplement: d4cp01646g1.pdf [file d4cp01646g1.pdf]

## Supporting Information

### AnB<sub>8</sub><sup>-</sup>: Borozene Complexes with Monovalent Actinide

Wan-Lu Li\*<sup>a,b</sup> and Jordan Burkhardt<sup>a,c</sup>

<sup>a</sup> Department of NanoEngineering University of California San Diego La Jolla, CA 92093 (USA)

<sup>b</sup> Program of Materials Science and Engineering, University of California San Diego, La Jolla, CA 92093 (USA)

<sup>c</sup> Department of Chemistry and Biochemistry, University of California San Diego La Jolla, CA 92093 (USA)

*E-mail: [wal019@ucsd.edu](mailto:wal019@ucsd.edu)*

#### Computational methods

Geometrical structures of both  $C_{7v}$  and  $C_s$  isomers were fully optimized using GGA-PBE<sup>1</sup> and hybrid PBE0<sup>2</sup> density functionals implemented in ADF 2023.102 package<sup>3</sup>. Vibrational frequencies were calculated to verify the true minimum on the potential energy surface. Slater-type basis sets with triple- $\zeta$  and one polarization term (TZP)<sup>4</sup> were applied treated by frozen-core approximation onto the inner shells [1s<sup>2</sup>-5d<sup>10</sup>] for actinides and [1s<sup>2</sup>] for boron. To appropriately address the scalar relativistic effect, the zero-order regular approximation (ZORA)<sup>5</sup> was employed.

To account for the multiconfigurational character, we employed the complete active space self-consistent field method (CASSCF)<sup>6</sup> combined with a second-order perturbation treatment of dynamic electron correlation (N-electron valence perturbation theory to second order, NEVPT2)<sup>7-11</sup> using the ORCA 5.0.4 package<sup>12, 13</sup>. We utilized the SARC-TZVP<sup>14</sup> basis set for actinide elements and the def2-TZVP<sup>15</sup> basis set for the B element with the SARC/J<sup>16</sup> fitting basis set to expedite the calculation of integrals. Spin-orbit coupling effects were approximated by an effective one-particle operator<sup>17, 18</sup>. In AcB<sub>8</sub><sup>-</sup>, the active space comprised one 7s orbital, 6d  $\delta$  orbitals, 6d  $\pi$  orbitals, and their respective B group orbital counterparts, constituting a CAS (6e, 7o) active space. For other AnB<sub>8</sub><sup>-</sup> species, the active orbital space consisted of the An 5f, 7s, 6d  $\pi$  and 6d  $\delta$  valence shell orbitals and the corresponding B orbital counterparts, 14 active orbitals in total.

Electronic structure and chemical bonding analyses were mainly focused on the  $C_{7v}$  isomer to determine the stability and oxidation state. To quantitatively elucidate the bonding mechanism between An and B<sub>8</sub> moieties, energy decomposition analysis–natural orbitals for chemical valence (EDA–NOCV)<sup>19, 20</sup> was performed. Another framework, principle interacting orbital (PIO) approach<sup>21</sup>, was also employed to identify the “dominant interacting orbitals” that are semi-localized and chemical-intuitively interpretable utilizing the Gaussian 09 calculation.<sup>22</sup> In terms of aromatic properties, we carried out adaptive natural density partitioning (AdNDP) analysis<sup>23</sup> to illustrate the multi-center bonding based on the canonical molecular orbitals. Nucleus-independent chemical shift (NICS)<sup>24</sup> index was calculated to quantitatively characterize the aromaticity.

## References

1. J. P. Perdew, K. Burke and M. Ernzerhof, *Phys. Rev. Lett.*, 1996, **77**, 3865.
2. C. Adamo and V. Barone, *J. Chem. Phys.*, 1999, **110**, 6158-6170.
3. ADF, 2023.102, SCM, Theoretical Chemistry, Vrije Universiteit, Amsterdam, The Netherlands, (<http://www.scm.com>).
4. E. van Lenthe and E. J. Baerends, *J. Comput. Chem.*, 2003, **24**, 1142-1156.
5. E. van Lenthe, E. J. Baerends and J. G. Snijders, *J. Chem. Phys.*, 1993, **99**, 4597-4610.
6. P.-Å. Malmqvist and B. O. Roos, *Chem. Phys. Lett.*, 1989, **155**, 189-194.
7. M. Atanasov, D. Aravena, E. Suturina, E. Bill, D. Maganas and F. Neese, *Coord. Chem. Rev.*, 2015, **289-290**, 177-214.
8. C. Angeli, R. Cimiraglia, S. Evangelisti, T. Leininger and J.-P. Malrieu, *J. Chem. Phys.*, 2001, **114**, 10252-10264.
9. C. Angeli, R. Cimiraglia and J.-P. Malrieu, *Chem. Phys. Lett.*, 2001, **350**, 297-305.
10. C. Angeli, R. Cimiraglia and J.-P. Malrieu, *J. Chem. Phys.*, 2002, **117**, 9138-9153.
11. C. Angeli, B. Bories, A. Cavallini and R. Cimiraglia, *J. Chem. Phys.*, 2006, **124**.
12. F. Neese, *WIREs Computational Molecular Science*, 2012, **2**, 73-78.
13. F. Neese, *WIREs Computational Molecular Science*, 2022, **12**, e1606.
14. D. A. Pantazis and F. Neese, *J. Chem. Theory Comput.*, 2011, **7**, 677-684.
15. F. Weigend and R. Ahlrichs, *Phys. Chem. Chem. Phys.*, 2005, **7**, 3297-3305.
16. F. Weigend, *Phys. Chem. Chem. Phys.*, 2006, **8**, 1057-1065.
17. B. A. Heß, C. M. Marian, U. Wahlgren and O. Gropen, *Chem. Phys. Lett.*, 1996, **251**, 365-371.
18. F. Neese, *J. Chem. Phys.*, 2005, **122**.
19. M. P. Mitoraj, A. Michalak and T. Ziegler, *J. Chem. Theory Comput.*, 2009, **5**, 962-975.
20. A. Michalak, M. Mitoraj and T. Ziegler, *J. Phys. Chem. A*, 2008, **112**, 1933-1939.
21. J.-X. Zhang, F. K. Sheong and Z. Lin, *Chem. Eur. J.*, 2018, **24**, 9639-9650.
22. *M. J. Frisch, et al., Gaussian Inc., Wallingford CT, 2009.*
23. D. Y. Zubarev and A. I. Boldyrev, *Phys. Chem. Chem. Phys.*, 2008, **10**, 5207-5217.
24. P. v. R. Schleyer, C. Maerker, A. Dransfeld, H. Jiao and N. J. R. van Eikema Hommes, *J. Am. Chem. Soc.*, 1996, **118**, 6317-6318.

**Table S1.** Fully optimized structures of  $AnB_8^-$  ( $An = Ac, Pa, Bk, Md, No$ ) at PBE0/TZP level. Two types of isomers with pseudo- $C_{7v}$  and  $C_s$  symmetries were tested.

AcB<sub>8</sub><sup>-</sup>:

$C_{7v}$ :

|      |           |           |           |
|------|-----------|-----------|-----------|
| 1.B  | -0.396970 | 1.739241  | 1.762143  |
| 2.B  | 1.112287  | 1.394763  | 1.762143  |
| 3.B  | 1.783969  | 0.000000  | 1.762143  |
| 4.B  | 0.000000  | 0.000000  | 2.052902  |
| 5.B  | 1.112287  | -1.394763 | 1.762143  |
| 6.B  | -0.396970 | -1.739241 | 1.762143  |
| 7.B  | -1.607301 | -0.774035 | 1.762143  |
| 8.B  | -1.607301 | 0.774035  | 1.762143  |
| 9.Ac | 0.000000  | 0.000000  | -0.821402 |

$C_s$ :

|      |           |           |           |
|------|-----------|-----------|-----------|
| 1.B  | 1.517408  | 1.691716  | -0.801224 |
| 2.B  | 1.692653  | 0.367626  | -1.637180 |
| 3.B  | 1.617565  | -1.099883 | -0.995673 |
| 4.B  | 2.138835  | 0.353116  | 0.000000  |
| 5.B  | 0.771496  | -2.058595 | 0.000000  |
| 6.B  | 1.617565  | -1.099883 | 0.995673  |
| 7.B  | 1.692653  | 0.367626  | 1.637180  |
| 8.B  | 1.517408  | 1.691716  | 0.801224  |
| 9.Ac | -0.685742 | -0.006998 | 0.000000  |

PaB<sub>8</sub><sup>-</sup>:

pseudo- $C_{7v}$ :

|      |           |           |           |
|------|-----------|-----------|-----------|
| 1.B  | 1.556053  | -0.396179 | -1.719487 |
| 2.B  | 1.358409  | -1.617108 | -0.781228 |
| 3.B  | 1.358409  | -1.617108 | 0.781228  |
| 4.B  | 1.923721  | -0.001767 | 0.000000  |
| 5.B  | 1.556053  | -0.396179 | 1.719487  |
| 6.B  | 1.475340  | 1.115520  | 1.384923  |
| 7.B  | 1.312703  | 1.810371  | 0.000000  |
| 8.B  | 1.475340  | 1.115520  | -1.384923 |
| 9.Pa | -0.663786 | -0.000631 | 0.000000  |

$C_s$ :

|     |          |           |           |
|-----|----------|-----------|-----------|
| 1.B | 1.386176 | 1.680257  | -0.795607 |
| 2.B | 1.546469 | 0.362160  | -1.627389 |
| 3.B | 1.529131 | -1.088204 | -0.955225 |
| 4.B | 2.075723 | 0.361909  | 0.000000  |
| 5.B | 0.560599 | -1.967047 | 0.000000  |
| 6.B | 1.529131 | -1.088204 | 0.955225  |
| 7.B | 1.546469 | 0.362160  | 1.627389  |

|      |           |           |          |
|------|-----------|-----------|----------|
| 8.B  | 1.386176  | 1.680257  | 0.795607 |
| 9.Pa | -0.636608 | -0.011234 | 0.000000 |

BkB<sub>8</sub>:

pseudo-C<sub>7v</sub>:

|      |           |           |           |
|------|-----------|-----------|-----------|
| 1.B  | 1.678401  | -1.610967 | -0.775258 |
| 2.B  | 1.678401  | -1.610967 | 0.775258  |
| 3.B  | 1.670734  | -0.397316 | 1.743286  |
| 4.B  | 1.930545  | 0.000009  | 0.000000  |
| 5.B  | 1.679962  | 1.114499  | 1.398832  |
| 6.B  | 1.667617  | 1.785984  | 0.000000  |
| 7.B  | 1.679962  | 1.114499  | -1.398832 |
| 8.B  | 1.670734  | -0.397316 | -1.743286 |
| 9.Bk | -0.701362 | -0.000037 | 0.000000  |

C<sub>s</sub>:

|      |           |           |           |
|------|-----------|-----------|-----------|
| 1.B  | 1.329968  | 1.682028  | -0.797744 |
| 2.B  | 1.535546  | 0.365358  | -1.626662 |
| 3.B  | 1.456997  | -1.094836 | -0.979452 |
| 4.B  | 2.020881  | 0.365893  | 0.000000  |
| 5.B  | 0.540712  | -1.999899 | 0.000000  |
| 6.B  | 1.456997  | -1.094836 | 0.979452  |
| 7.B  | 1.535546  | 0.365358  | 1.626662  |
| 8.B  | 1.329968  | 1.682028  | 0.797744  |
| 9.Bk | -0.619564 | -0.009360 | 0.000000  |

MdB<sub>8</sub>:

pseudo-C<sub>7v</sub>:

|      |           |           |           |
|------|-----------|-----------|-----------|
| 1.B  | 1.734964  | 1.583460  | -0.775857 |
| 2.B  | 1.704207  | 0.369393  | -1.742238 |
| 3.B  | 1.677811  | -1.144113 | -1.397312 |
| 4.B  | 1.943643  | -0.033297 | 0.000000  |
| 5.B  | 1.673142  | -1.818789 | 0.000000  |
| 6.B  | 1.677811  | -1.144113 | 1.397312  |
| 7.B  | 1.704207  | 0.369393  | 1.742238  |
| 8.B  | 1.734964  | 1.583460  | 0.775857  |
| 9.Md | -0.732265 | 0.012428  | 0.000000  |

C<sub>s</sub>:

|     |          |           |           |
|-----|----------|-----------|-----------|
| 1.B | 1.639508 | 1.651446  | -0.787871 |
| 2.B | 1.630726 | 0.300382  | -1.624246 |
| 3.B | 1.688214 | -1.182406 | -0.942847 |
| 4.B | 2.142410 | 0.255847  | 0.000000  |
| 5.B | 1.618706 | -2.473576 | 0.000000  |
| 6.B | 1.688214 | -1.182406 | 0.942847  |

|      |           |          |          |
|------|-----------|----------|----------|
| 7.B  | 1.630726  | 0.300382 | 1.624246 |
| 8.B  | 1.639508  | 1.651446 | 0.787871 |
| 9.Md | -0.724893 | 0.031387 | 0.000000 |

NoB<sub>8</sub>:

C<sub>7v</sub>:

|      |           |           |           |
|------|-----------|-----------|-----------|
| 1.B  | -0.398106 | 1.744215  | -1.561657 |
| 2.B  | -1.611897 | 0.776249  | -1.561657 |
| 3.B  | -1.611897 | -0.776249 | -1.561657 |
| 4.B  | 0.000000  | 0.000000  | -1.799432 |
| 5.B  | -0.398106 | -1.744215 | -1.561657 |
| 6.B  | 1.115467  | -1.398752 | -1.561657 |
| 7.B  | 1.789070  | 0.000000  | -1.561657 |
| 8.B  | 1.115467  | 1.398752  | -1.561657 |
| 9.No | 0.000000  | 0.000000  | 0.880527  |

C<sub>s</sub>:

|      |           |           |           |
|------|-----------|-----------|-----------|
| 1.B  | 1.651306  | 1.661301  | -0.788052 |
| 2.B  | 1.636646  | 0.309283  | -1.624381 |
| 3.B  | 1.693222  | -1.175176 | -0.942857 |
| 4.B  | 2.144358  | 0.263743  | 0.000000  |
| 5.B  | 1.629202  | -2.466445 | 0.000000  |
| 6.B  | 1.693222  | -1.175176 | 0.942857  |
| 7.B  | 1.636646  | 0.309283  | 1.624381  |
| 8.B  | 1.651306  | 1.661301  | 0.788052  |
| 9.No | -0.726935 | 0.028401  | 0.000000  |

**Table S2.** Relative energies of different electronic structures of  $AnB_8^-$  ( $An = Ac, Pa, Bk, Md, No$ ) at PBE/TZP and PBE0/TZP levels.

| Species   | An atomic electronic configuration | 2S+1 | PBE    | PBE0                     |
|-----------|------------------------------------|------|--------|--------------------------|
| $AcB_8^-$ | $s^2$                              | 1    | 0.00   | 0.00                     |
|           | $d^1s^1$                           | 3    | 5.15   | 6.98                     |
|           | $d^2$                              | 3    | 27.70  | -                        |
| $PaB_8^-$ | $f^1d^2s^1$                        | 5    | 0.00   | 0.00                     |
|           | $f^2d^1s^1$                        | 5    | 3.32   | 2.20 (4.11) <sup>a</sup> |
|           | $f^2s^2$                           | 3    | 7.64   | 4.73                     |
| $BkB_8^-$ | $f^9s^1$                           | 7    | 0.00   | 0.00                     |
|           | $f^8s^2$                           | 7    | 2.53   | 4.19 (2.99) <sup>a</sup> |
|           | $f^7d^1s^1$                        | 9    | 26.46  | 24.13                    |
| $MdB_8^-$ | $f^{13}s^1$                        | 3    | 0.00   | 0.00                     |
|           | $f^{12}s^2$                        | 3    | 40.41  | 46.78                    |
|           | $f^{12}d^1s^1$                     | 5    | 59.33  | 62.79                    |
| $NoB_8^-$ | $f^{14}s^1$                        | 2    | 0.00   | 0.00                     |
|           | $f^{14}d^1$                        | 2    | 42.84  | 43.38                    |
|           | $f^{13}d^1s^1$                     | 4    | 119.57 | 133.13                   |

<sup>a</sup> The energies are obtained from CASSCF/NEVPT2/SO calculations.

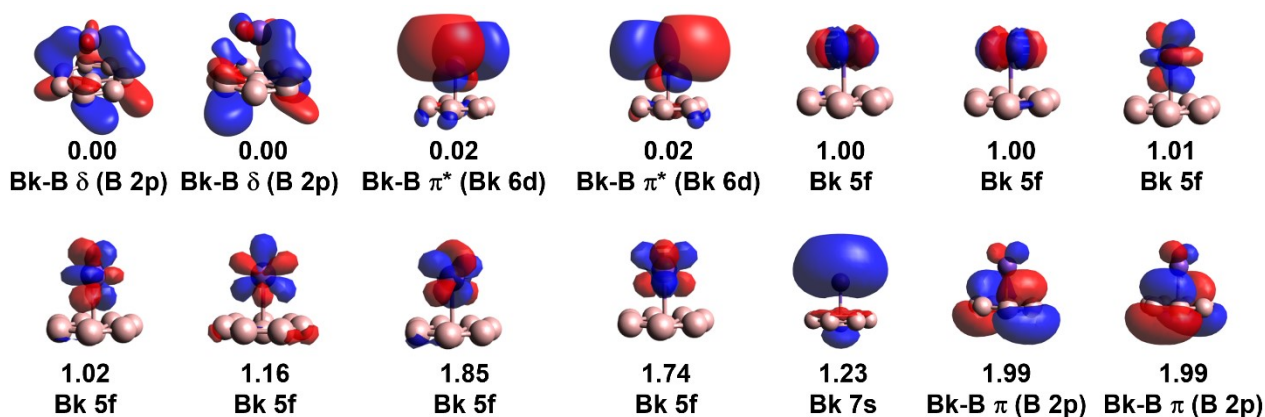

**Fig. S1.** Natural orbital occupations of  $BkB_8^-$  obtained from a CASSCF (14e, 14o) calculation at the PBE0/TZP optimized geometry, with the consideration of SOC effect. The dominant contributions are indicated for each orbital. The CI coefficient for Bk (+I) ( $5f^97s^1$ ) is 76%, with a 22% mixture of Bk (+I) ( $5f^87s^2$ ).

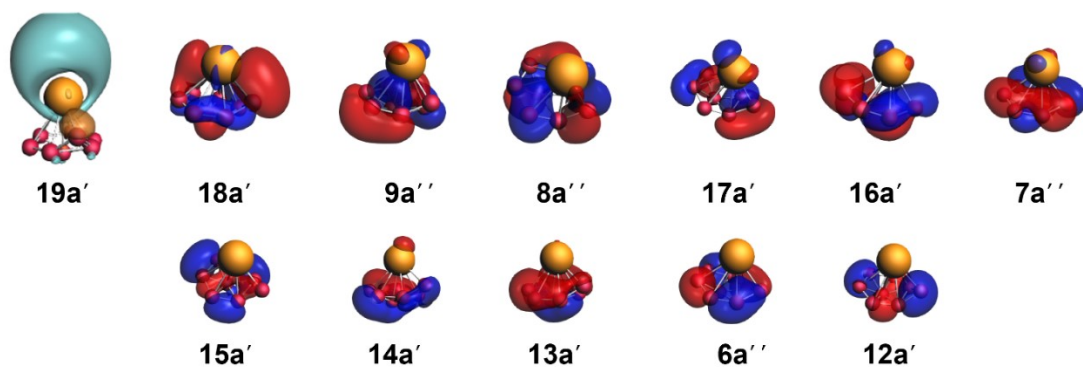

**Fig. S2.** Frontier orbital contours (isovalue = 0.03 a.u.) of  $\text{AcB}_8^-$  with trivalent Ac (+III) OS at PBE0/TZVP level.

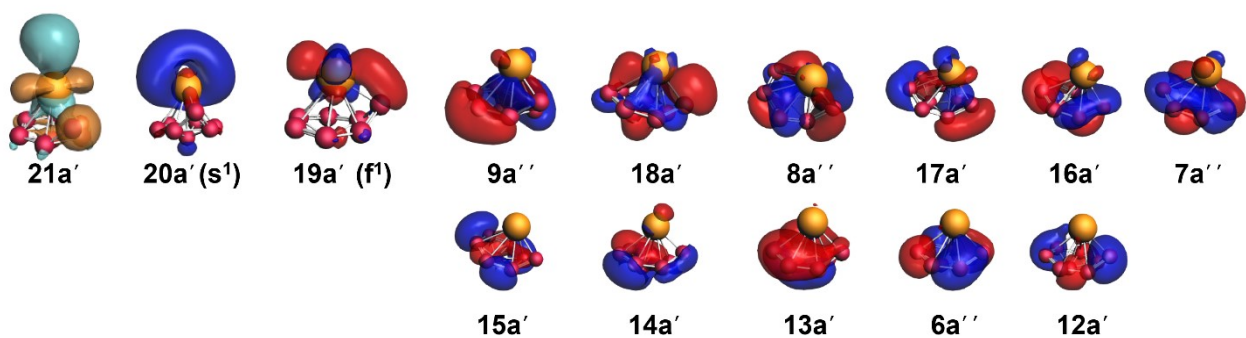

**Fig. S3.** Frontier orbital contours (isovalue = 0.03 a.u.) of  $\text{PaB}_8^-$  with trivalent Pa (+III,  $f^1s^1$ ) OS at PBE0/TZVP level.

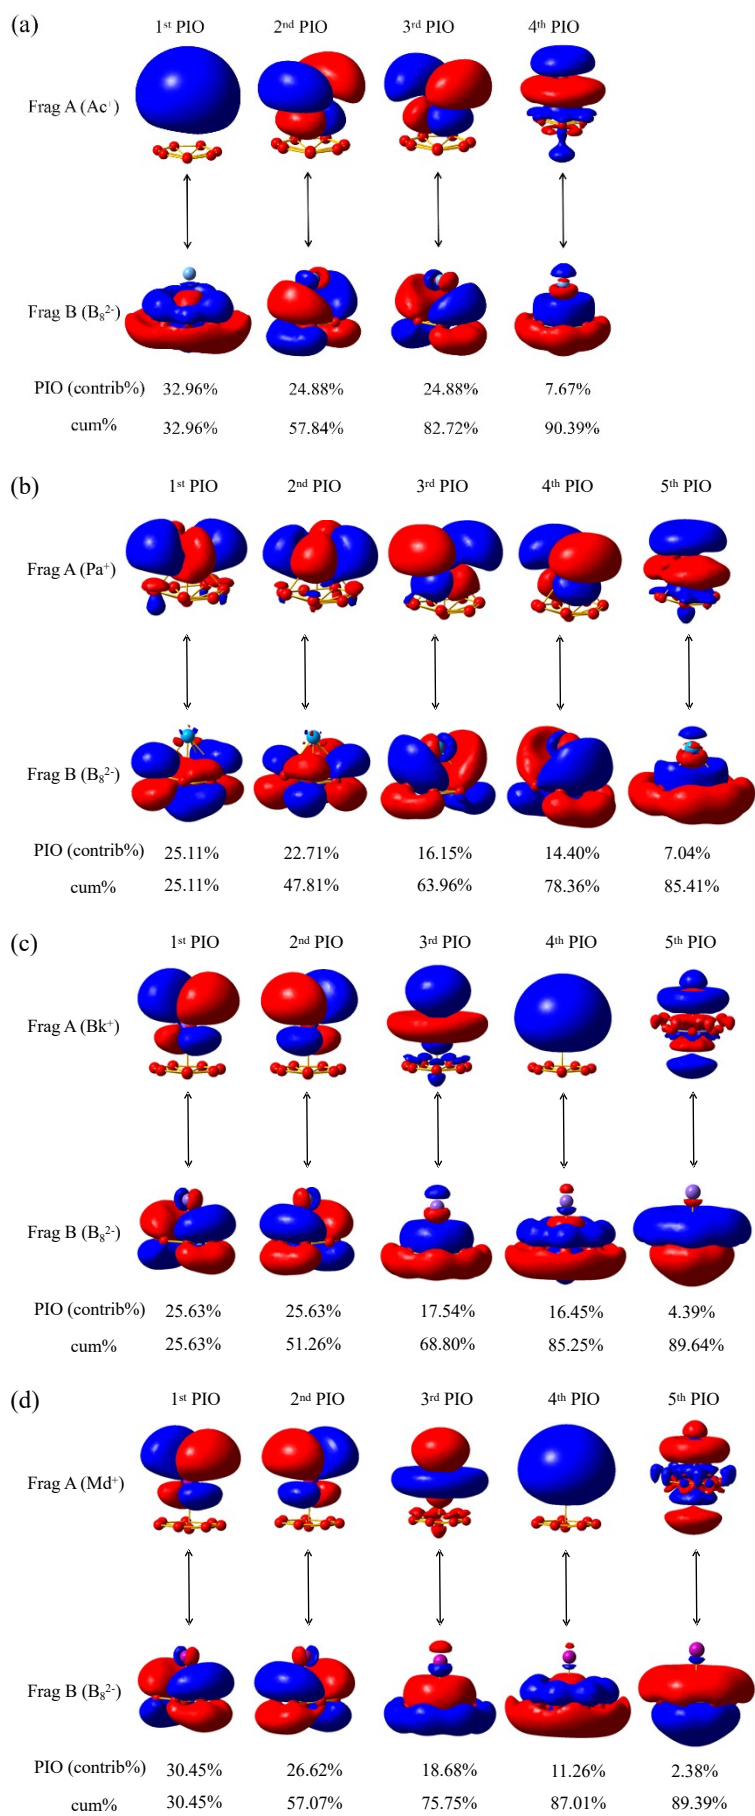



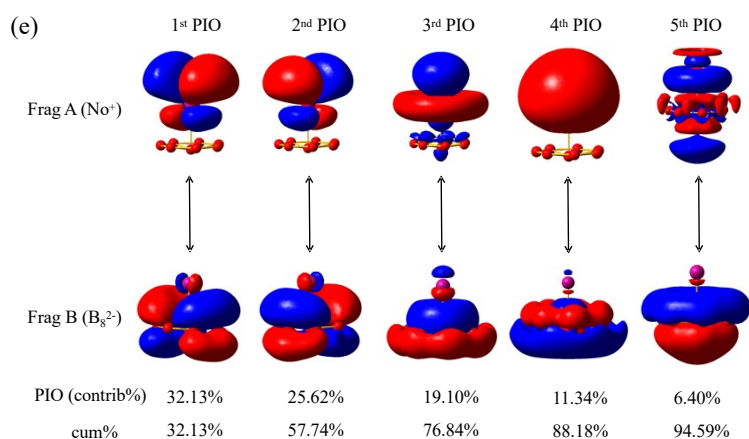

**Fig. S4.** The results of PIO analysis on the  $AnB_8^-$  ( $An = Ac, Pa, Bk, Md$  and  $No$ ) at the PBE0/ECP60MWB/6-311G\* level with  $An^+$  and  $B_8^{2-}$  as two fragments. The contribution of first six dominant PIO (contrib%) and cumulative contribution (cum%) to the total interactions between two fragments are shown. The isovalue for each orbital is 0.02 a.u.

**Table S3.** The EDA-NOCV results for the  $AnB_8^-$  ( $An = Ac, Pa, Bk, Md$  and  $No$ ) at the PBE0/TZP level. The scalar relativistic (SR) effects were taken into account according to the zero-order regular approximation (ZORA). (Energy values are given in kcal/mol,  $\Delta E_{int} = \Delta E_{Pauli} + \Delta E_{elstat} + \Delta E_{orb}$ ).

| Fragments                 | $Ac^+ (7s^2)$<br>+ $B_8^{2-} (^1A')$ | $Pa^+ (5f^1 6d^2 7s^1)$<br>+ $B_8^{2-} (^1A')$ | $Bk^+ (5f^9 7s^1)$<br>+ $B_8^{2-} (^1A')$ | $Md^+ (5f^{13} 7s^1)$<br>+ $B_8^{2-} (^1A')$ | $No^+ (5f^{14} 7s^1)$<br>+ $B_8^{2-} (^1A')$ |
|---------------------------|--------------------------------------|------------------------------------------------|-------------------------------------------|----------------------------------------------|----------------------------------------------|
| $\Delta E_{int}$          | -275.51                              | -305.91                                        | -245.72                                   | -297.66                                      | -239.10                                      |
| $\Delta E_{pauli}$        | 176.76                               | 318.70                                         | 143.24                                    | 107.89                                       | 102.40                                       |
| $\Delta E_{elstat}^{[a]}$ | -309.79 (69.33%)                     | -395.86 (63.38%)                               | -288.79 (74.24%)                          | -266.24 (65.65%)                             | -262.44 (76.85%)                             |
| $\Delta E_{orb}^{[a]}$    | -138.47 (30.67%)                     | -228.75 (36.62%)                               | -100.18 (25.76%)                          | -139.30 (34.35%)                             | -79.05 (23.15%)                              |
| $\Delta E_{orb(1)}^{[b]}$ | -44.11 (31.86%)                      | -46.66 (20.40%)                                | -23.90 (23.86%)                           | 13.42 (-9.63%)                               | -26.39 (33.38%)                              |
| $\Delta E_{orb(2)}^{[b]}$ | -31.97 (23.09%)                      | -42.24 (18.47%)                                | -14.28 (14.25%)                           | -17.35 (12.46%)                              | -16.38 (20.72%)                              |
| $\Delta E_{orb(3)}^{[b]}$ | -31.93 (23.06%)                      | -30.12 (13.17%)                                | -21.84 (21.81%)                           | -28.95 (20.79%)                              | -15.83 (20.02%)                              |
| $\Delta E_{orb(4)}^{[b]}$ | -9.67 (6.98%)                        | -35.60 (15.56%)                                | -15.38 (15.35%)                           | -16.82 (12.07%)                              | -7.29 (9.22%)                                |
| $\Delta E_{orb(5)}^{[b]}$ | -4.09 (2.95%)                        | -29.13 (12.74%)                                | -8.70 (8.68%)                             | -14.11 (10.13%)                              | -2.49 (3.15%)                                |
| $\Delta E_{orb(6)}^{[b]}$ | -4.09 (2.95%)                        | -20.50 (8.96%)                                 | -4.18 (4.17%)                             | -17.79 (12.77%)                              | -2.49 (3.15%)                                |
| $\Delta E_{orb(7)}^{[b]}$ | -2.96 (2.14%)                        | -8.70 (3.81%)                                  | -2.21 (2.20%)                             | -17.51 (12.57%)                              | /                                            |
| $\Delta E_{orb(8)}^{[b]}$ | -2.59 (1.87%)                        | -3.71 (1.62%)                                  | -2.13 (2.13%)                             | -13.82 (9.92%)                               | /                                            |
| $\Delta E_{orb(9)}^{[b]}$ | -2.59 (1.87%)                        | -2.84 (1.24%)                                  | -2.36 (2.36%)                             | -13.64 (9.79%)                               | /                                            |
| $\Delta E_{rest}^{[b]}$   | -4.47 (3.23%)                        | -9.24 (4.04%)                                  | -5.19 (5.18%)                             | -12.72 (9.13%)                               | -8.19 (10.36%)                               |

[a] The values in parentheses provide the percentage contribution to the total attractive interactions  $\Delta E_{elstat} + \Delta E_{orb}$ .

[b] The values within the parentheses show the contribution to the total orbital interaction.

**Table S4.** The deformation densities ( $\Delta\rho$ , isosurface=0.0005) of the dominant pairwise orbital interactions of EDA-NOCV analysis (charge density flow from red to blue) of  $AnB_8^-$  at the PBE0/TZP level. The energies in kcal/mol.

|           |          | s                                                                                             | d/d-p $\delta$                                                                              |                                                                                             | d-p $\pi$                                                                                     |                                                                                                | d-p $\sigma$                                                                                    |
|-----------|----------|-----------------------------------------------------------------------------------------------|---------------------------------------------------------------------------------------------|---------------------------------------------------------------------------------------------|-----------------------------------------------------------------------------------------------|------------------------------------------------------------------------------------------------|-------------------------------------------------------------------------------------------------|
| $AcB_8^-$ |          | 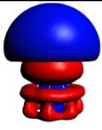<br>-44.11   |                                                                                             |                                                                                             | <br>-31.97  | <br>-31.93  | <br>-9.67    |
| $PaB_8^-$ | $\alpha$ | <br>-30.46   | <br>-28.33 | <br>-35.55 | <br>-24.84  | <br>-16.04  | <br>-11.17   |
|           | $\beta$  |                                                                                               |                                                                                             |                                                                                             | <br>-23.46  | <br>-19.87  | <br>-10.83   |
| $BkB_8^-$ | $\alpha$ | <br>-22.07   |                                                                                             |                                                                                             | <br>-12.00  | <br>-11.84  | <br>-6.06    |
|           | $\beta$  |                                                                                               |                                                                                             |                                                                                             | <br>-4.17 | <br>-7.47 | <br>-5.99  |
| $MdB_8^-$ | $\alpha$ | <br>19.13  |                                                                                             |                                                                                             | <br>-8.97 | <br>-8.80 | <br>-4.68  |
|           | $\beta$  |                                                                                               |                                                                                             |                                                                                             | <br>32.55 | <br>-8.38 | <br>-20.15 |
| $NoB_8^-$ | $\alpha$ | <br>-18.44 |                                                                                             |                                                                                             | <br>-8.46 | <br>-8.44 | <br>-4.45  |
|           | $\beta$  |                                                                                               |                                                                                             |                                                                                             | <br>-7.94 | <br>-7.92 | <br>-7.39  |

(a)  $\text{AcB}_8^-$

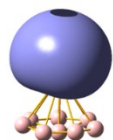

1c-1e Ac 7s  
ON = 2.00

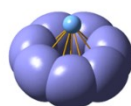

7 x 2c-2e B-B bonds  
ON = 1.94

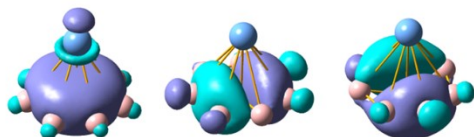

3 x 9c-2e  $\sigma$  bonds  
ON = 2.00

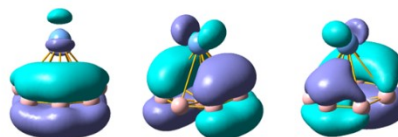

3 x 9c-2e  $\pi$  bonds  
ON = 2.00

(b)  $\text{PaB}_8^-$

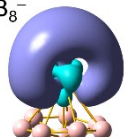

1c-1e Pa 7s  
ON = 0.92

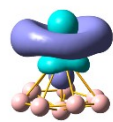

1c-1e Pa 5f  
ON = 1.00

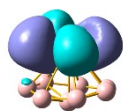

2 x 1c-1e Pa 6d  
ON = 0.62~0.68

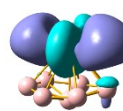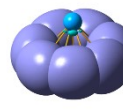

7 x 2c-2e B-B bonds  
ON = 1.92

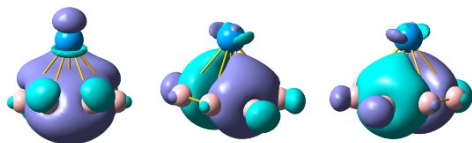

3 x 9c-2e  $\sigma$  bonds  
ON = 2.00

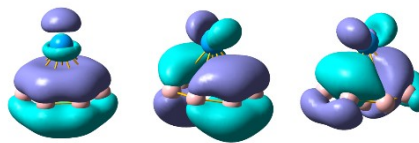

3 x 9c-2e  $\pi$  bonds  
ON = 2.00

(c)  $\text{BkB}_8^-$

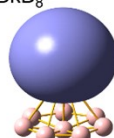

1c-1e Bk 7s  
ON = 1.00

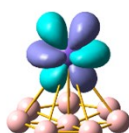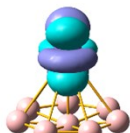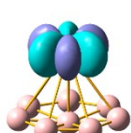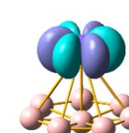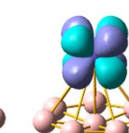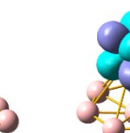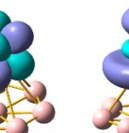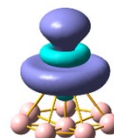

5 x 1c-1e Bk 5f  
ON = 1.00

2 x 1c-2e Bk 5f  
ON = 1.94~1.98

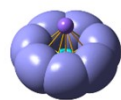

7 x 2c-2e B-B bonds  
ON = 1.94

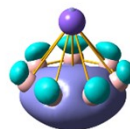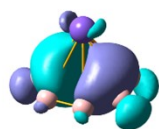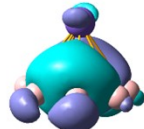

3 x 9c-2e  $\sigma$  bonds  
ON = 2.00

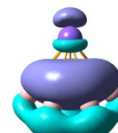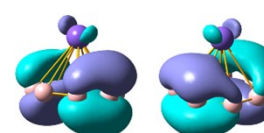

3 x 9c-2e  $\pi$  bonds  
ON = 2.00

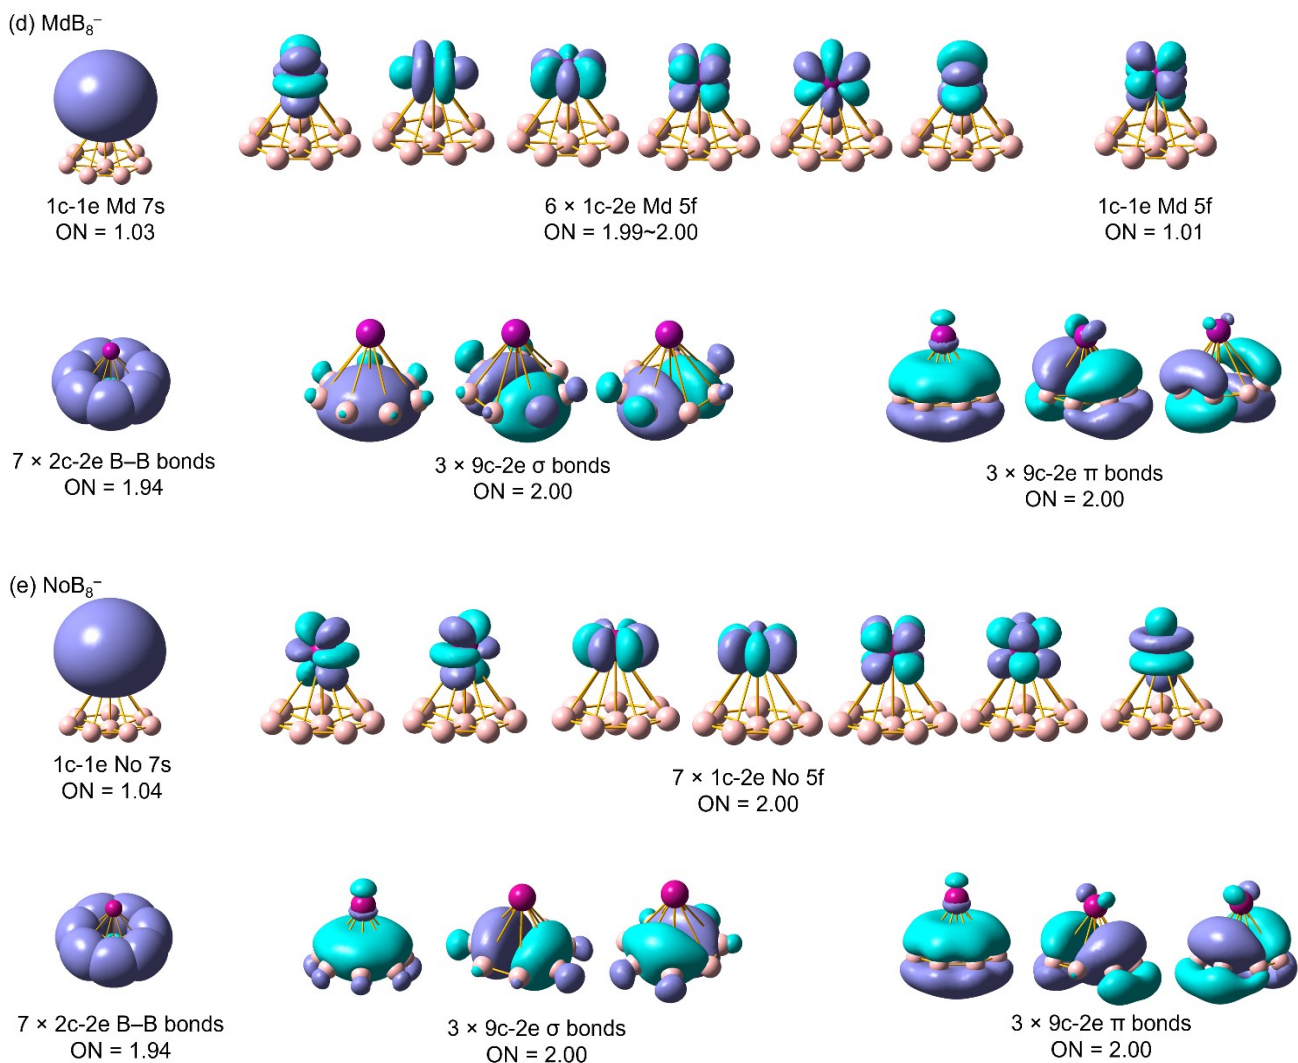

**Fig. S5.** AdNDP delocalized bonding analyses of  $\text{AnB}_8^-$  (An = Ac, Pa, Bk, Md, No) at PBE0/VTZ level.

**Table S5.** The NICS indices of  $\text{AnB}_8^-$  (An=Ac, Pa, Bk, Md and No) calculated at the PBE0/ECP60MWB/6-311G\* level, at the center B of  $\text{B}_8$  ring.

|                  | NICS (0) | NICS (1) |
|------------------|----------|----------|
| $\text{AcB}_8^-$ | -57.24   | -0.56    |
| $\text{PaB}_8^-$ | -54.75   | -14.23   |
| $\text{BkB}_8^-$ | -102.44  | -33.41   |
| $\text{MdB}_8^-$ | -82.38   | -23.10   |
| $\text{NoB}_8^-$ | -83.89   | -22.97   |

**Table S6.** Different B-B distances in  $AnB_8^-$  (An=Ac, Pa, Bk, Md and No) at PBE0/TZP level.

|           | Peripheral B-B    | Radial B-B        |
|-----------|-------------------|-------------------|
| $AcB_8^-$ | $1.553 \pm 0.009$ | $1.820 \pm 0.014$ |
| $PaB_8^-$ | $1.555 \pm 0.004$ | $1.850 \pm 0.039$ |
| $BkB_8^-$ | $1.551 \pm 0.001$ | $1.806 \pm 0.001$ |
| $MdB_8^-$ | $1.552 \pm 0.003$ | $1.805 \pm 0.001$ |
| $NoB_8^-$ | $1.552 \pm 0.000$ | $1.805 \pm 0.000$ |
